# Supplementary material for: A simple template-free synthesis of nanoporous ZnS–In2S3–Ag2S solid solutions for highly efficient photocatalytic H2 evolution under visible light
Source: Royal Society of Chemistry journal article supplement (doi:10.1039/b819300b), 2009-01-01
Supplement: b819300b.pdf [file b819300b.pdf]

## Supporting Information

A simple template-free synthesis of nanoporous ZnS-In<sub>2</sub>S<sub>3</sub>-Ag<sub>2</sub>S solid solutions for highly efficient photocatalytic H<sub>2</sub> evolution under visible light

Yingxuan Li, Gang Chen,\* Chao Zhou, and Jingxue Sun

*Department of Chemistry, Harbin Institute of Technology, Harbin  
150001, People's Republic of China*

\* To whom correspondence should be addressed. Email address: gchen@hit.edu.cn.

### Experimental details

The photocatalytic gas evolution was conducted in an outer irradiation quartz cell with a side window, which was connected to a closed gas-circulating system. The photocatalyst powder (0.015 g) was dispersed by ultrasonic for 30 min in an aqueous solution (320 mL) containing 0.6 M Na<sub>2</sub>SO<sub>3</sub> – 0.1 M Na<sub>2</sub>S as electron donors. The reaction was carried out by irradiating the mixture with light from a Xe lamp (300 W) which is equipped with an optical filter ( $\lambda > 400$  nm) to cut off the light in the ultraviolet region. Gas evolution was analyzed by a gas chromatograph (Agilent 6820, TCD, Ar carrier).

Apparent quantum yield (A.Q.Y.) was calculated by the following equation:

$$\begin{aligned} \text{A.Q.Y. (\%)} &= \frac{\text{The number of reacted electrons}}{\text{The total number of incident photons}} \times 100 \\ &= \frac{\text{The number of evolved H}_2 \text{ molecules} \times 2}{\text{The total number of incident photons}} \times 100 \end{aligned}$$

The total number of incident photons at 420 nm was measured by a 300 W xenon lamp with a cutoff filter and band-pass filter ( $\lambda$ : 420 nm, half width: 15 nm) and light flux meter (1930-C, Newport) with the light sensor.

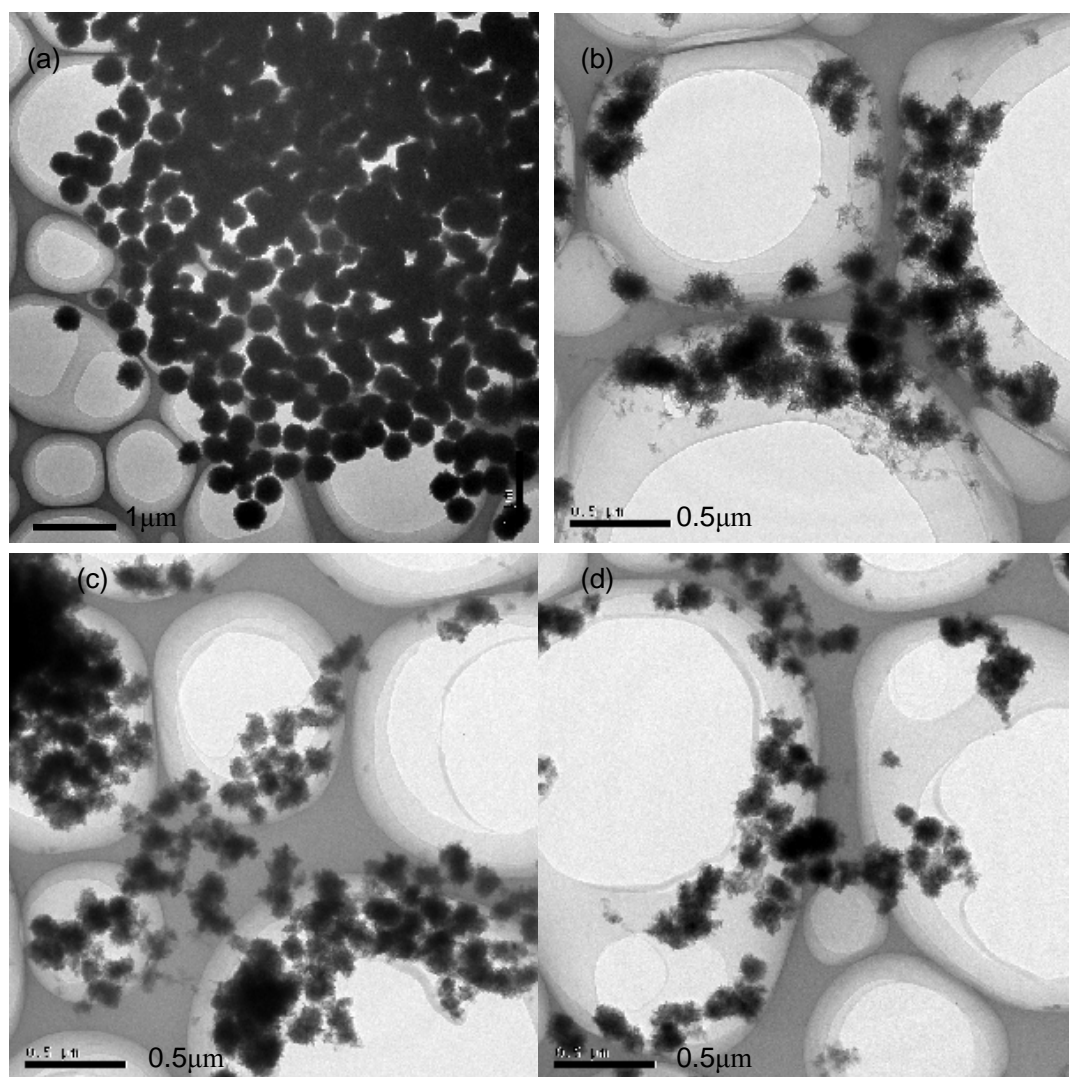

**Fig. S1.** TEM images of  $\text{ZnIn}_{0.23}\text{Ag}_{2x}\text{S}_{1.345+x}$  ( $x = 0-0.045$ ): (a)  $\text{ZnIn}_{0.23}\text{S}_{1.345}$ ; (b)  $\text{ZnIn}_{0.23}\text{Ag}_{0.04}\text{S}_{1.37}$ ; (c)  $\text{ZnIn}_{0.23}\text{Ag}_{0.07}\text{S}_{1.38}$ ; (d)  $\text{ZnIn}_{0.23}\text{Ag}_{0.09}\text{S}_{1.39}$ .

**Table S1.** Dependence of photocatalytic activities for  $\text{H}_2$  evolution from an aqueous 0.6 M  $\text{Na}_2\text{SO}_3$ –0.1 M  $\text{Na}_2\text{S}$  solution under visible light irradiation over  $\text{ZnIn}_{0.23}\text{Ag}_{2x}\text{S}_{1.345+x}$  solid solutions upon the composition (Value of  $x$ ). The samples were illuminated continuously with light from a 300 W Xe lamp for 4 h. **The average crystallite sizes calculated from the line broadening of the XRD peaks using the Scherer formula.**

| Composition $x$ | Band gap (eV) | Rate of $\text{H}_2$ evolution (mmol/h/0.015g cat) | A.Q.Y. (%) | Average crystallite sizes (nm) |
|-----------------|---------------|----------------------------------------------------|------------|--------------------------------|
| 0               | 3.26          | 0.7                                                | 0          | 12.2                           |
| 0.02            | 2.88          | 3.3                                                | 19.8       | 11.8                           |
| 0.035           | 2.76          | 2.8                                                | 19.6       | 12.0                           |
| 0.045           | 2.58          | 2.3                                                | 14.8       | 11.6                           |

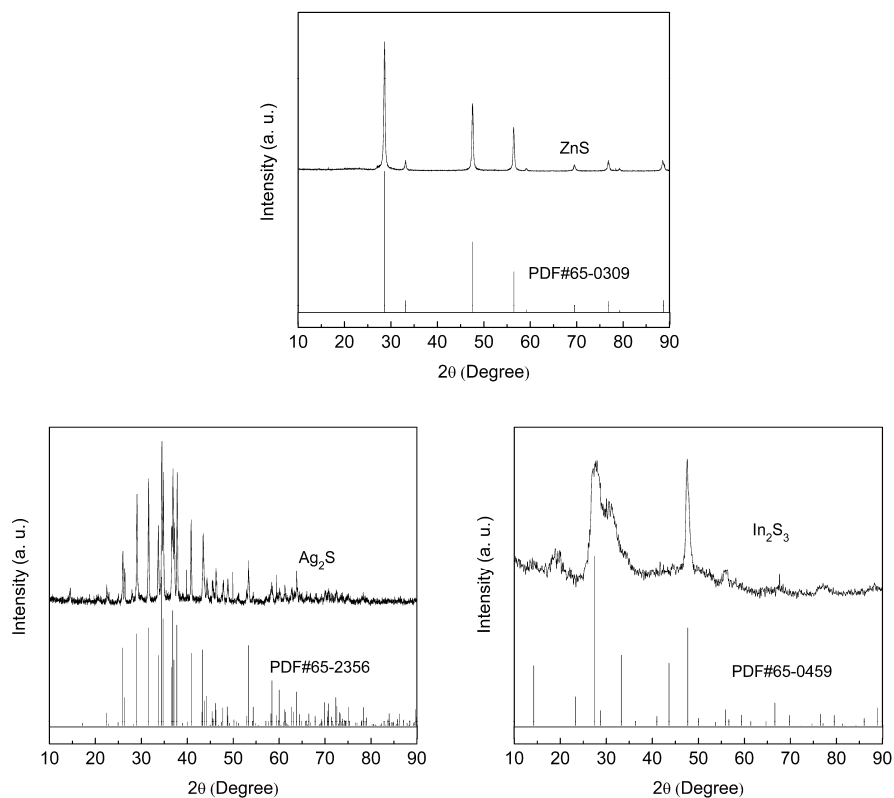

**Fig. S2.** Powder XRD patterns of ZnS, Ag<sub>2</sub>S and In<sub>2</sub>S<sub>3</sub>

**Table S2.** Photocatalytic activities of ZnS, In<sub>2</sub>S<sub>3</sub> and Ag<sub>2</sub>S

| Samples                        | Rate of H <sub>2</sub> evolution (mmol/h/0.015g cat) |
|--------------------------------|------------------------------------------------------|
| ZnS                            | 0.021                                                |
| In <sub>2</sub> S <sub>3</sub> | 0.022                                                |
| Ag <sub>2</sub> S              | 0                                                    |
